# Supplementary material
Source: PubMed Central journal article supplement (PMC11221606)
Supplement: NIHMS1959041-supplement-1.pdf [file NIHMS1959041-supplement-1.pdf]

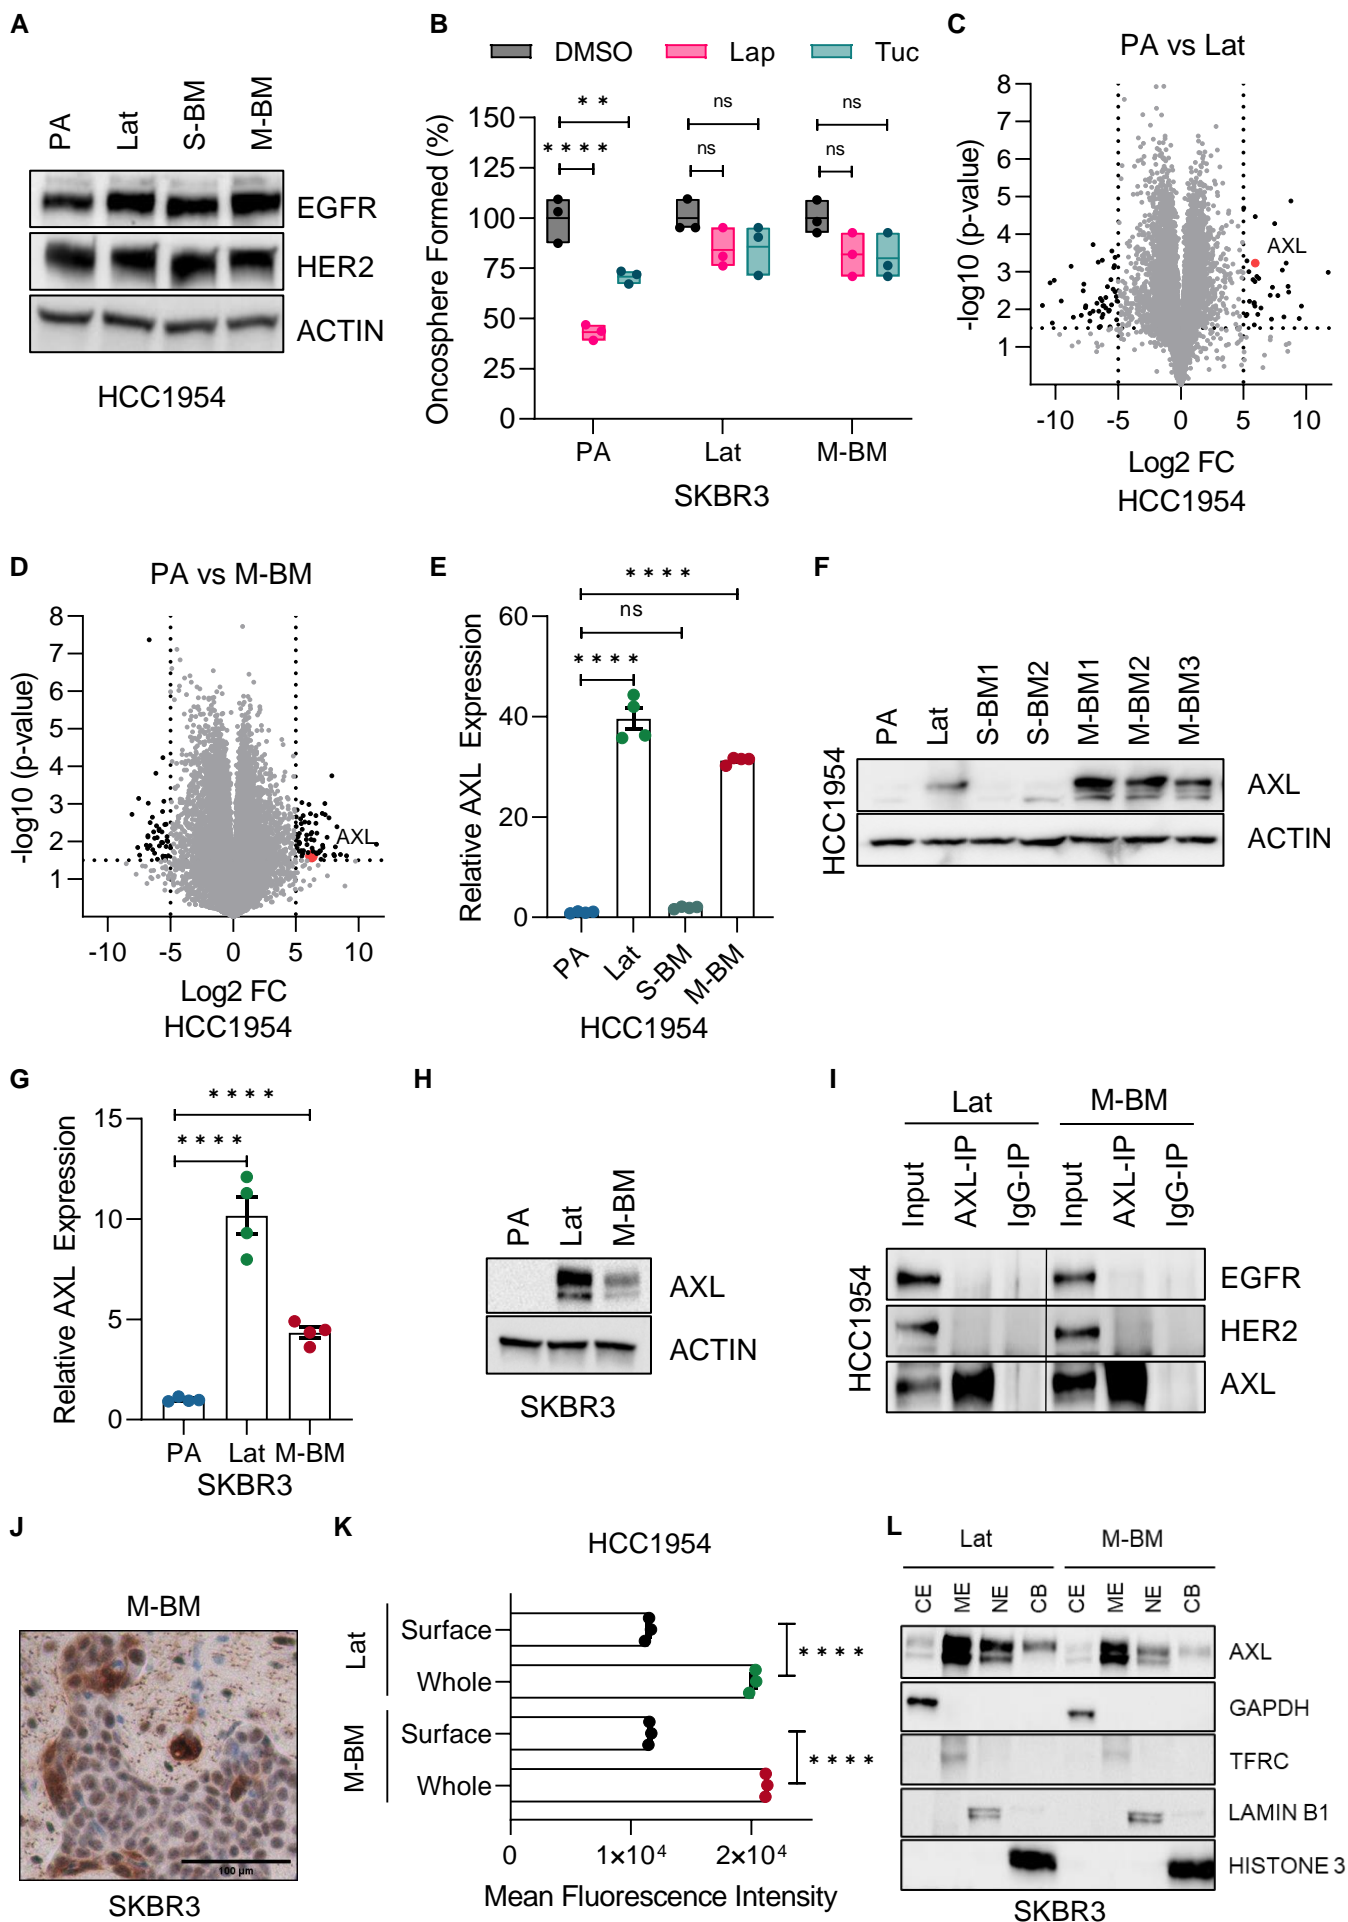

**Supplementary Figure 1. AXL enrichment in latent and metachronous brain-tropic cells.**

**A**, Immunoblots showing EGFR and HER2 expression in HCC1954 PA, Lat, S-BM and M-BM cells. **B**, Relative quantification of oncospheres formed by SKBR3 PA, Lat and M-BM cells seven days post-treatment with Tucatinib (3 $\mu$ M) and Lapatinib (1 $\mu$ M) compared to DMSO control. Data are presented as mean  $\pm$  SEM. One-way ANOVA was used, followed by the Dunnett test. \*\*,  $P < 0.01$ . \*\*\*\*,  $P < 0.0001$ . ns: not significant. **C-D**, Volcano plots showing differentially expressed genes in HCC1954 Lat and M-BM cells. Normalized gene count TPM. **E**, AXL mRNA levels in HCC 1954 Lat, S-BM and M-BM cells normalized to PA. Unpaired Student t test. \*\*\*\*,  $P < 0.001$ . ns: not significant. **F**, Immunoblot showing AXL expression in HCC1954 PA, Lat and S-BM derivative and M-BM derivative cells. **G**, AXL mRNA levels in SKBR3 Lat and M-BM cells normalized to PA. Unpaired Student t test. \*\*\*\*,  $P < 0.001$ . **H**, Immunoblot showing AXL expression in SKBR3 PA, Lat and M-BM cells. **I**, Immunoblots show no interaction between immunoprecipitated AXL and EGFR or HER2 in HCC1954 Lat and M-BM cells. **J**, Representative image of AXL IHC on brain metastatic lesion in mice bearing SKBR3 M-BM cells. **K**, Total AXL expression (mean fluorescence intensity of surface expression and surface plus intracellular expression (whole)) in HCC1954 Lat and M-BM cells. **L**, Immunoblot analysis of subcellular fractions from SKBR3 Lat and M-BM cells showing AXL localization and purity of subcellular fractions. GAPDH (CE, cytoplasmic extract), TFRC (ME, membrane extract), Lamin-B1 (NE, soluble nuclear extract) and Histone-3 (CB, chromatin bound extract).
