# Supplementary material
Source: PubMed Central journal article supplement (PMC11221606)
Supplement: NIHMS1959041-supplement-2.pdf [file NIHMS1959041-supplement-2.pdf]

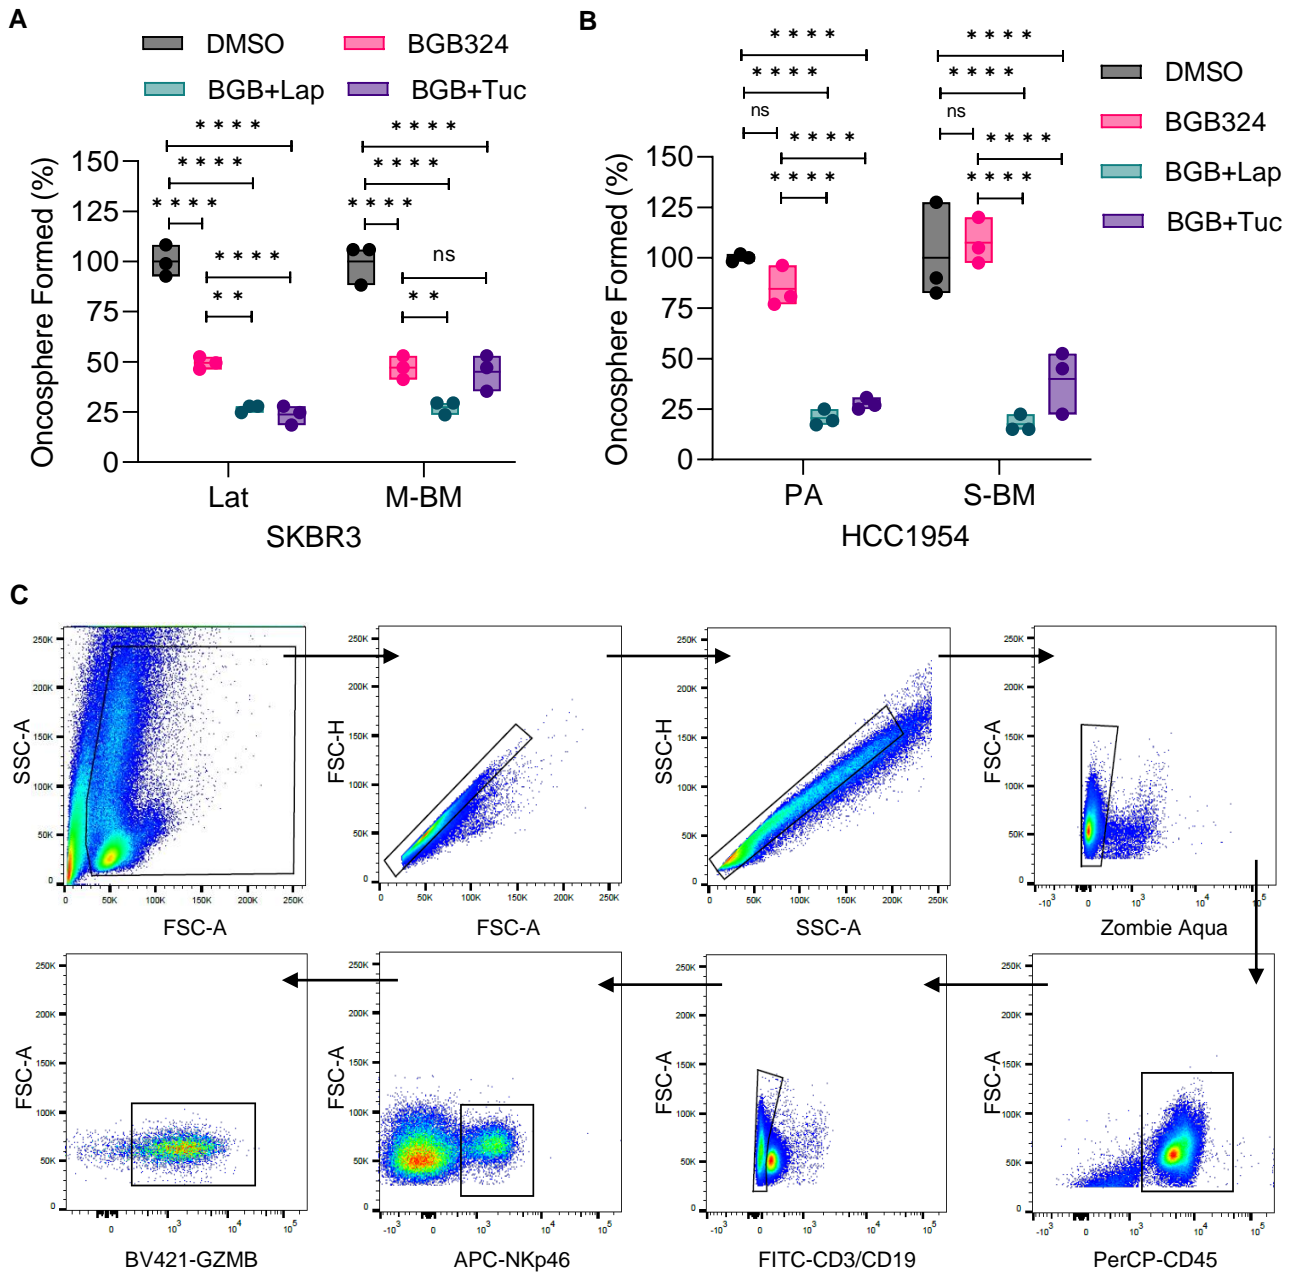

**Supplementary Figure 2. AXL inhibition enhances cytotoxic NK cells in metastatic recurrence.**

**A-B**, Relative quantification of oncospheres formed by (A) SKBR3 Lat and M-BM cells and (B) HCC1954 PA and S-BM cells treated with BGB324 (BGB, 1 $\mu$ M) alone or in combination with Lapatinib (Lap, 1 $\mu$ M) and Tucatinib (Tuc, 3 $\mu$ M) for seven days. Data are presented as mean  $\pm$  SEM. One-way ANOVA was used, followed by the Dunnett test. \*\*, P < 0.01, \*\*\*\*, P < 0.0001, ns: not significant. **C**, Gating strategy used for flow cytometry analysis to define NK cell populations from peripheral blood collected from experiment in figure 2C-D.
