# Supplementary material
Source: PubMed Central journal article supplement (PMC11221606)
Supplement: NIHMS1959041-supplement-4.pdf [file NIHMS1959041-supplement-4.pdf]

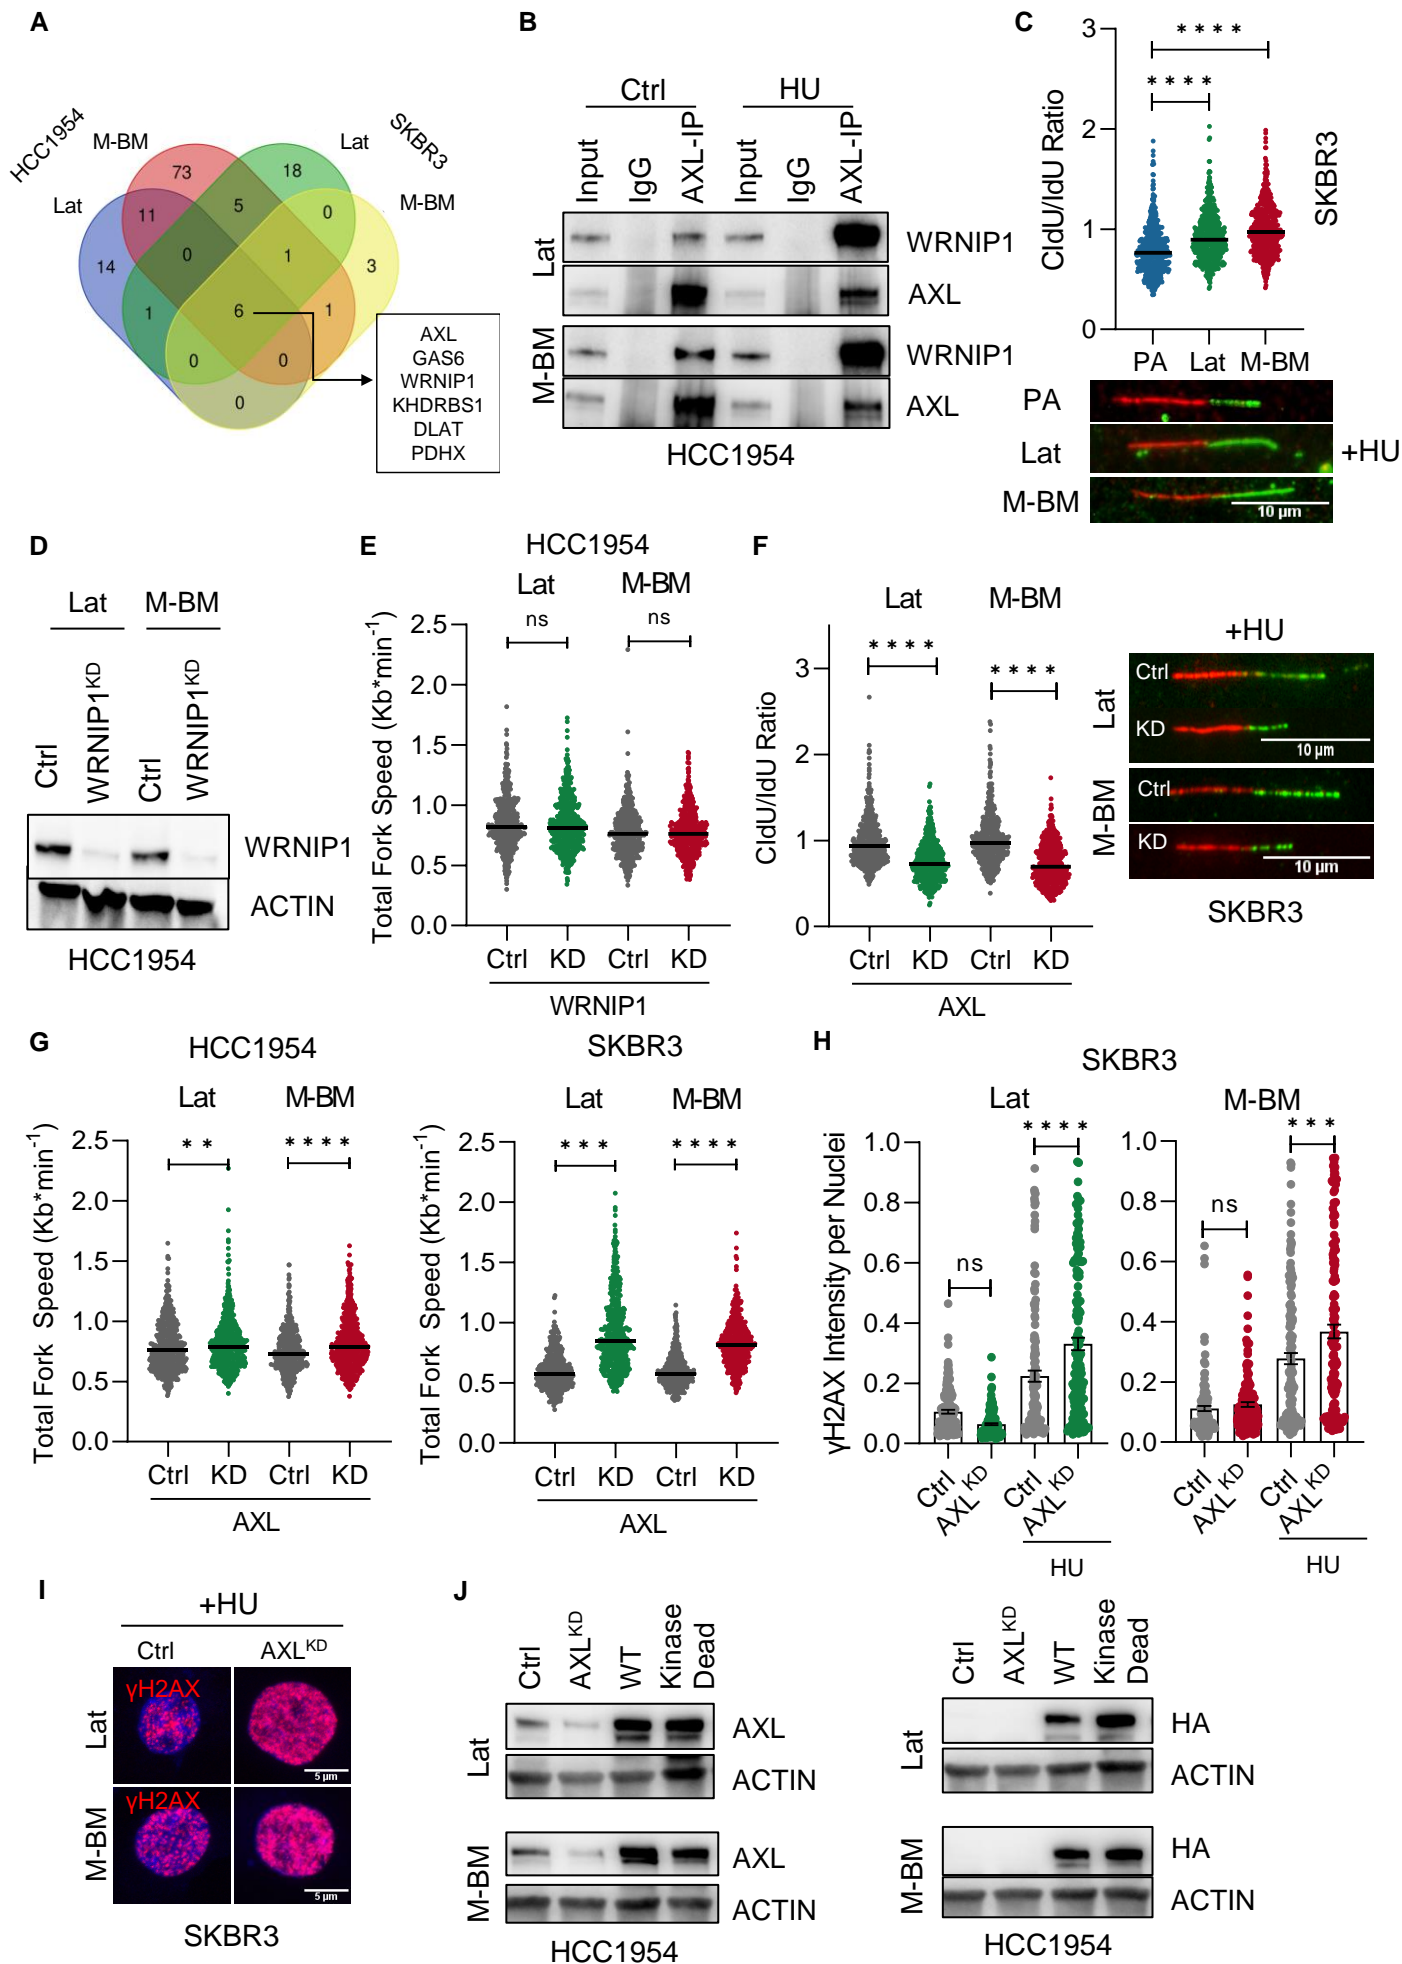

**Supplementary Figure 4. AXL-WRNIP1 depletion attenuates DNA replication stress response in Lat and M-BM cells.**

**A**, Venn diagram highlighting number of AXL interacting proteins identified by mass spectrometry analysis in HCC1954 and SKBR3 Lat and M-BM cells. Protein candidates were filtered by normalizing to IgG control in Lat and M-BM cells.  $2 \geq$  PSM,  $2 \geq$  fold change and 1% FDR. **B**, Immunoblot showing AXL-WRNIP1 interaction in HCC1954 Lat and M-BM cells under normal (Ctrl) and replication stress induced condition (in presence of 4mM HU for 5hrs). **C**, Relative fork degradation measured by the CldU/IdU ratio in presence of 4mM HU. Representative images of DNA fibers from SKBR3 PA, Lat and M-BM cells are also shown. IdU (red color) and CldU (green color). N = 3 for all experiments. Data are presented as mean  $\pm$  SEM. Mann-Whitney U test, \*\*\*\*\*,  $P < 0.0001$ . **D**, Immunoblotting of WRNIP1 in HCC1954 WRNIP1 knockdown (WRNIP1<sup>KD</sup>) Lat and M-BM cells. **E**, Total fork speed measured by the length sum of IdU and CldU and such values were converted into kilobases using the conversion factor  $1 \mu\text{m} = 2.59 \text{ kb}$  of HCC1954 Lat and M-BM cells under WRNIP1 depletion. N = 3 for all experiments. Data are presented as mean  $\pm$  SEM. Mann-Whitney U test, ns: no significant. **F**, Relative fork degradation measured by the CldU/IdU ratio in presence of 4mM HU upon SKBR3 AXL knockdown (AXL<sup>KD</sup>) in Lat and M-BM cells. N = 3 for all experiments. Data are presented as mean  $\pm$  SEM. Mann-Whitney U test, \*\*\*\*\*,  $P < 0.0001$ . **G**, Total fork speed measured by the length sum of IdU and CldU and such values were converted into kilobases using the conversion factor  $1 \mu\text{m} = 2.59 \text{ kb}$  of HCC1954 and SKBR3 Lat and M-BM cells under AXL depletion. N = 3 for all experiments. Data are presented as mean  $\pm$  SEM. Mann-Whitney U test, \*\*\*\*\*,  $P < 0.0001$ , \*\*\*,  $P < 0.001$  \*\*,  $P < 0.01$ . **H-I**,  $\gamma$ H2AX intensity quantification of SKBR3 Lat and M-BM cells treated with 4mM HU for 5hrs. Representative image of  $\gamma$ H2AX intensity under HU. Data are presented as mean  $\pm$  SEM. One-way ANOVA was used, followed by the Dunnett test. \*\*\*,  $P < 0.001$ , ns: not significant. **J**, Immunoblotting of AXL and HA-tag of control (Ctrl), AXL<sup>KD</sup>, and reintroduced wildtype (WT) and kinase dead AXL full length in HCC1954 AXL<sup>KD</sup> Lat and M-BM cells.
