# Supplementary material
Source: PubMed Central journal article supplement (PMC11221606)
Supplement: NIHMS1959041-supplement-5.pdf [file NIHMS1959041-supplement-5.pdf]

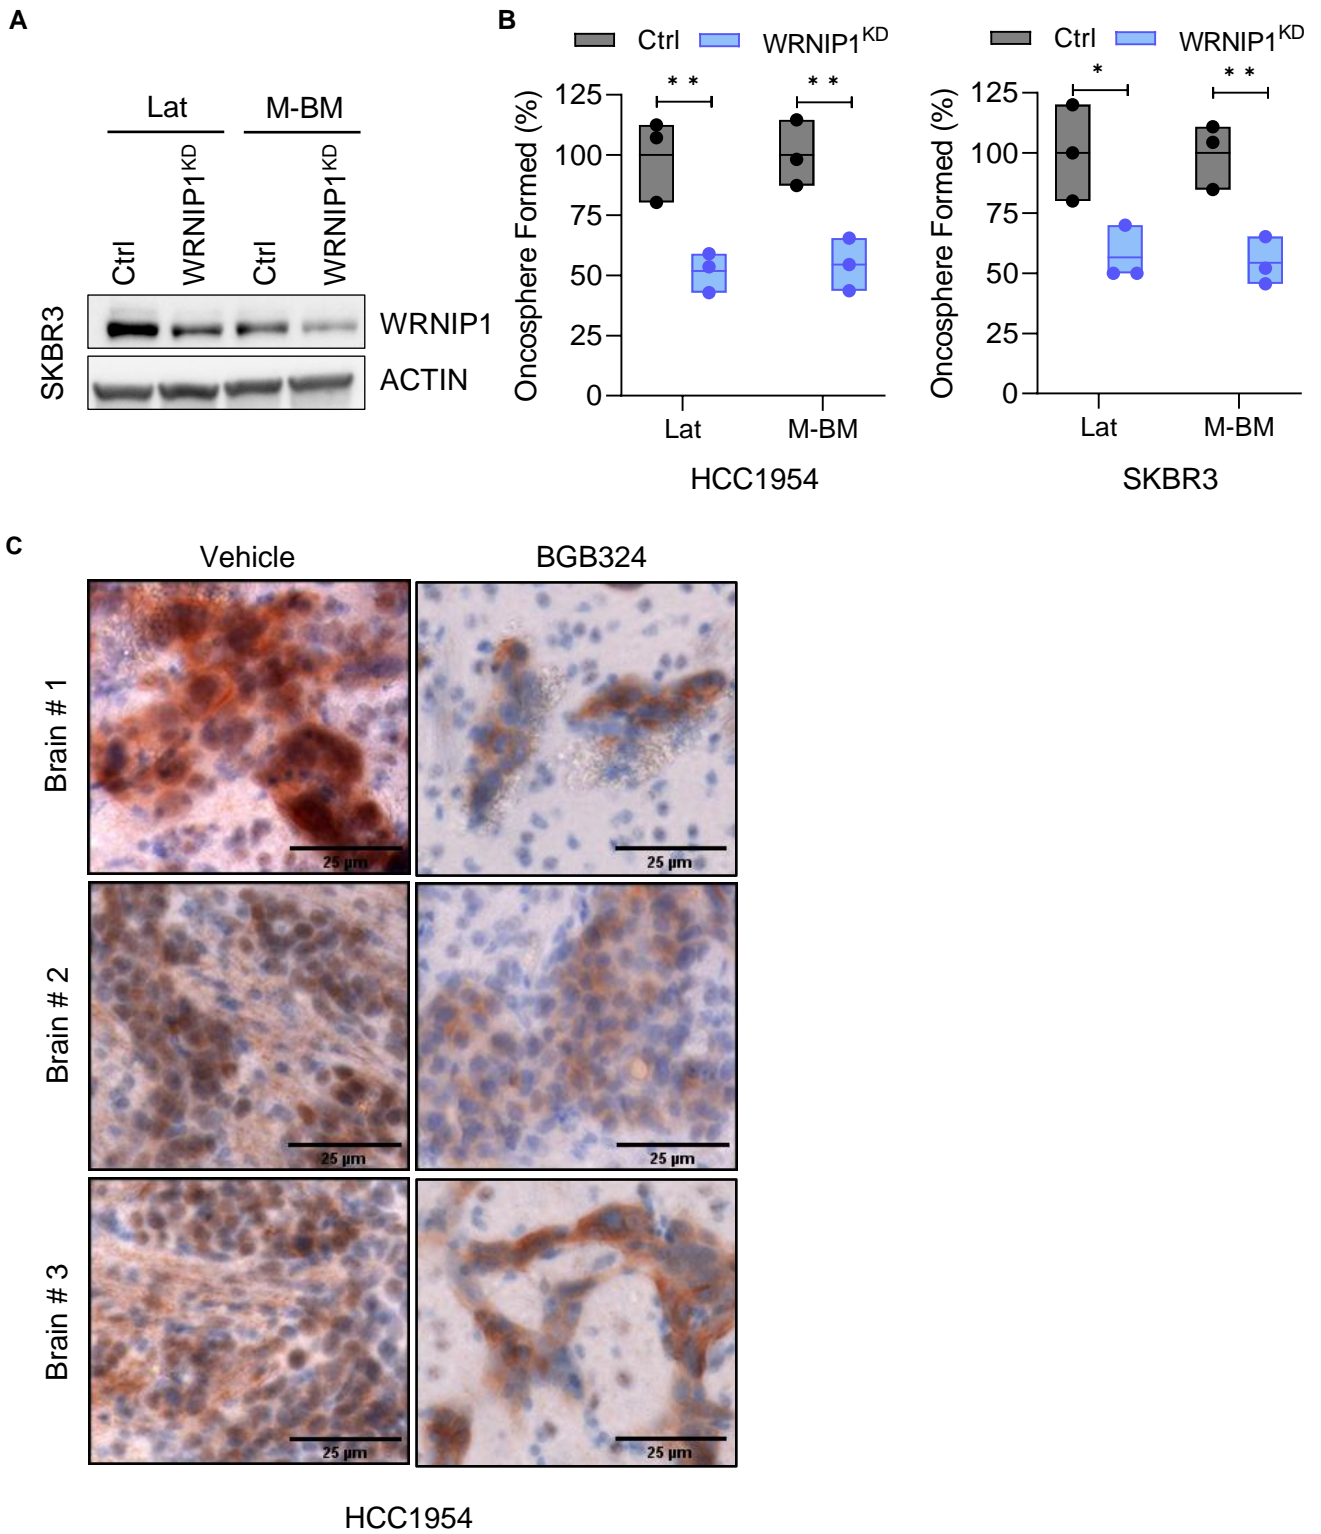

**Supplementary Figure 5. WRNIP1 depletion attenuates oncosphere formation while AXL inhibitor reduces nuclear AXL localization in brain-tropic cells.**

**A**, Immunoblotting of WRNIP1 in SKBR3 WRNIP1<sup>KD</sup> Lat and M-BM cells. **B**, Relative quantification of oncospheres formed upon WRNIP1<sup>KD</sup> in HCC1954 and SKBR3 Lat and M-BM cells compared to control (Ctrl) for seven days. Data are presented as mean  $\pm$  SEM. One-way ANOVA was used, followed by the Dunnett test. \*,  $P < 0.05$ , \*\*,  $P < 0.01$ . **C**, Representative images of AXL IHC on brain metastatic lesions in athymic mice bearing HCC1954 M-BM cells treated with BGB324 (50mg/kg, BID) or vehicle orally 3 days post-injection for 5 weeks of experiment from figure 2C.
